# Supplementary material for: Systematic comparison of biologically active foreign ions-codoped calcium phosphate microparticles on osteogenic differentiation in rat osteoporotic and normal mesenchymal stem cells
Source: PubMed Central journal article supplement (PMC5482678; doi:10.18632/oncotarget.16618), 2017-03-28
Supplement: oncotarget-08-36578-s001.pdf [file oncotarget-08-36578-s001.pdf]

# Systematic comparison of biologically active foreign ions-codoped calcium phosphate microparticles on osteogenic differentiation in rat osteoporotic and normal mesenchymal stem cells

## SUPPLEMENTARY MATERIALS

### SUPPLEMENTARY FIGURES

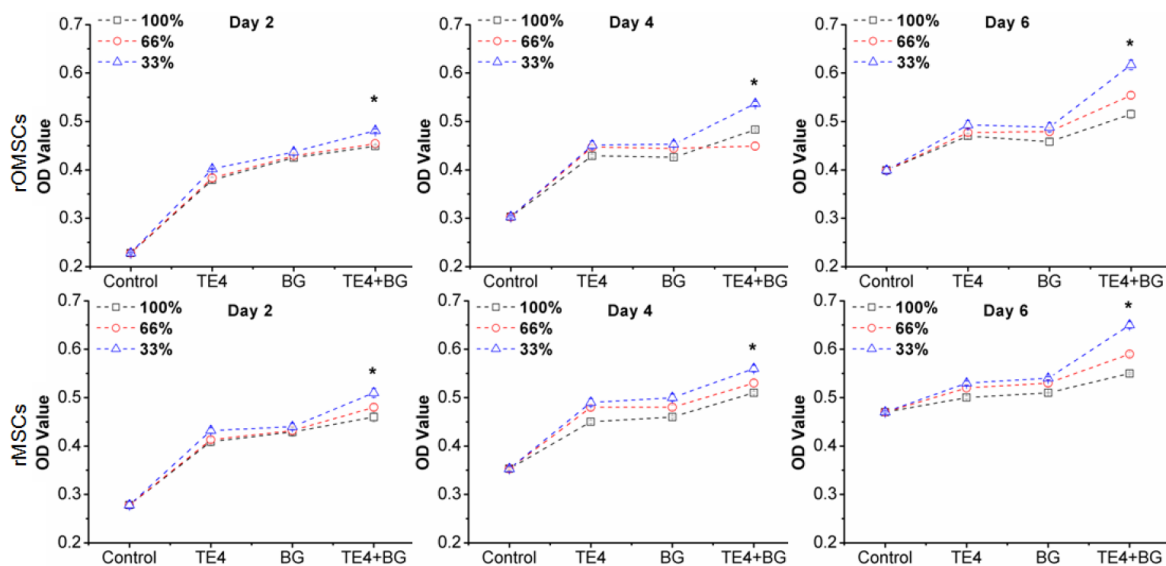

**Supplementary Figure 1: Effect of ionic extraction of materials on cell proliferation.** TE4+BG group data compared with TE4, BG and control groups (\* p<0.05).

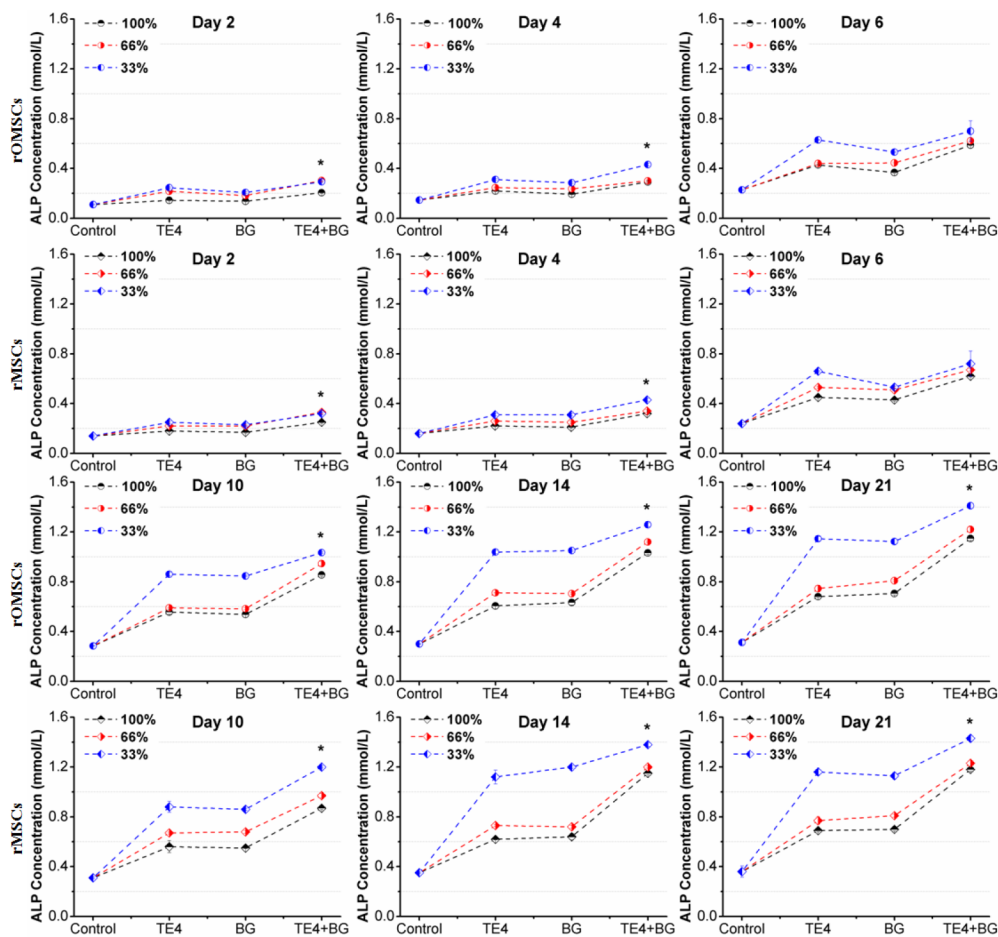

Supplementary Figure 2: ALP activity in rOMSCs and rMSCs in the different material groups. TE4+BG group data compared with TE4, BG and control groups (\* p<0.05).
